# Supplementary material
Source: Springer Nature journal article supplement (https://www.springermedizin.de/resource/supplementary/13058_2009_2432_MOESM9_ESM.pdf/9701396)
Supplement: MOESM9 [file 9701396]

ER status

pCR

pCR|ER-

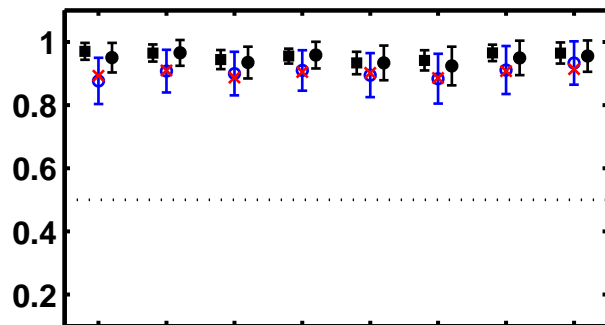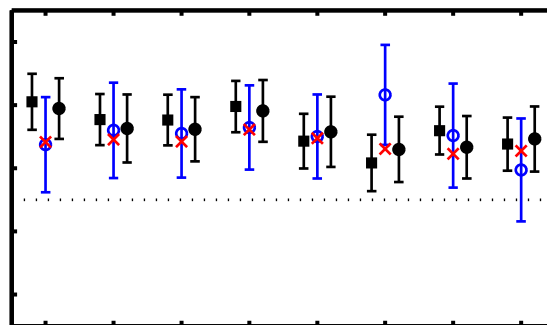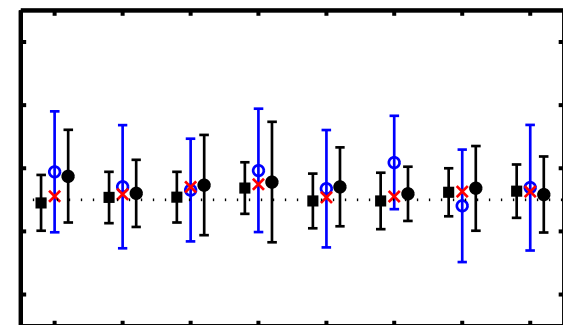

FS1

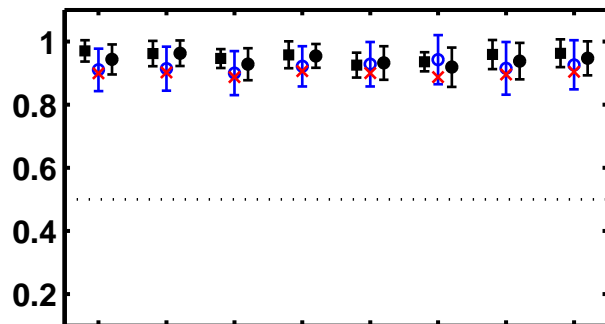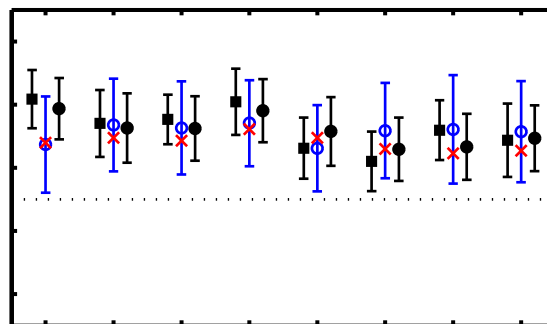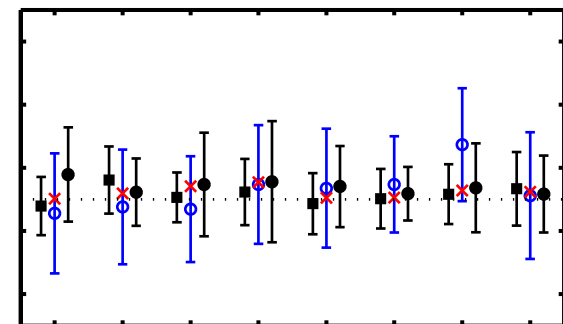

FS2

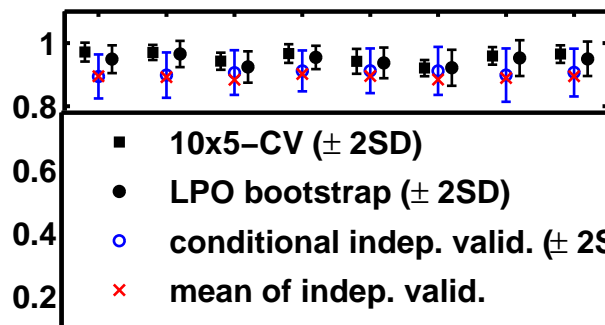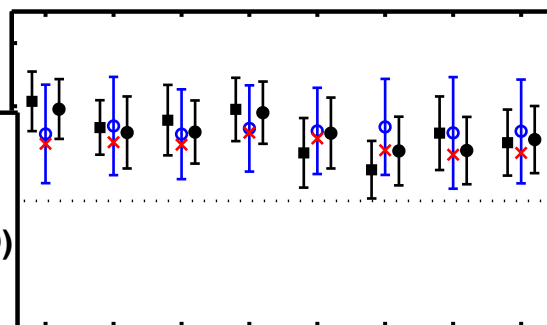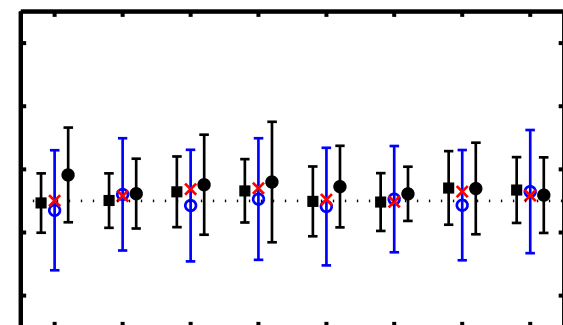

FS3

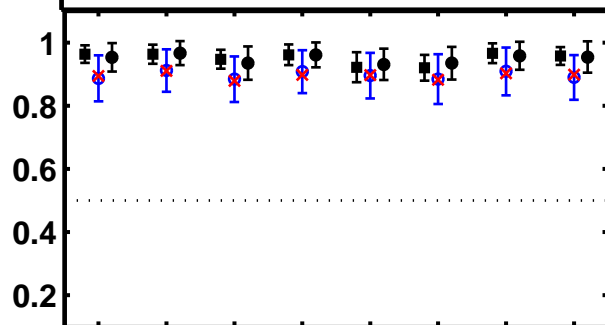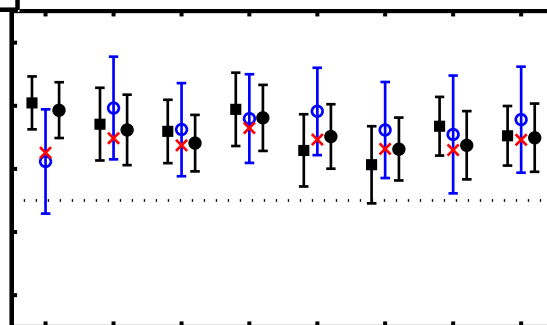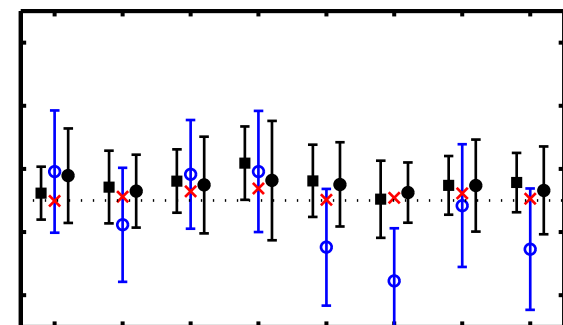

FS4

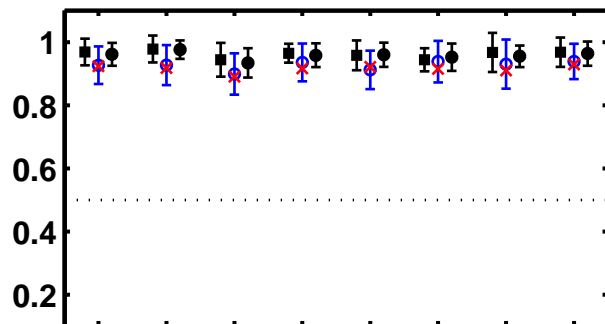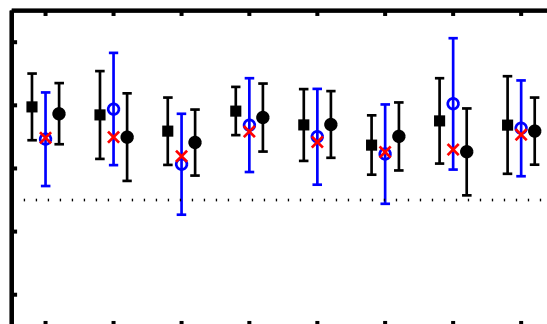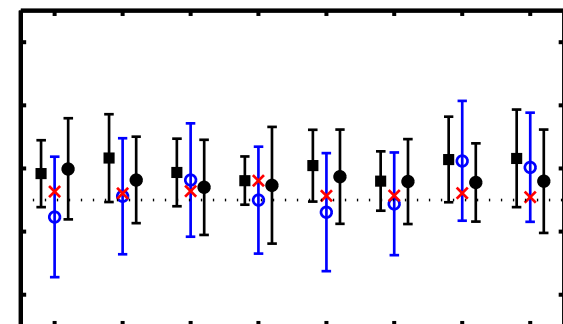

FS5

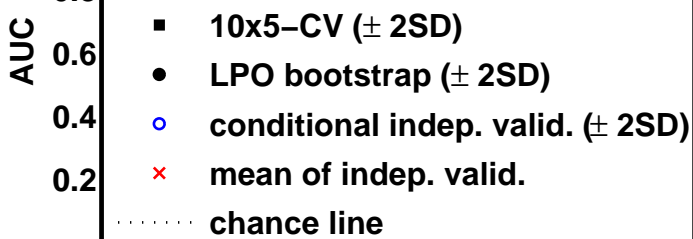

DLDA

LDA

KNN3

KNN11

SVM05

SVM2

LREG

QDA

DLDA

LDA

KNN3

KNN11

SVM05

SVM2

LREG

QDA

DLDA

LDA

KNN3

KNN11

SVM05

SVM2

LREG

QDA
